# Supplementary material
Source: PubMed Central journal article supplement (PMC3331941)
Supplement: NIHMS348687-supplement-02.pdf [file NIHMS348687-supplement-02.pdf]

## Supplemental Table 1

Densitometry measurement of Caspase 9 and cleavage of caspase-3 of RTM treated Daudi, MT2, BCBL treated cells.

| Cell Lines   | Pro-Caspase 9 |             |             |             | Cleaved-Caspase 9 |            |                 | Cleaved-Caspase 3 |                 |             |                 |
|--------------|---------------|-------------|-------------|-------------|-------------------|------------|-----------------|-------------------|-----------------|-------------|-----------------|
|              | DMSO          | VP-16       | RTM 25 nM   | RTM 50 nM   | VP16              | RTM 50 nM  | RTM 50nM + VP16 | RTM 25 nM         | RTM 25nM + VP16 | RTM 50 nM   | RTM 50nM + VP16 |
| <b>Daudi</b> | <b>1</b>      | <b>1.5</b>  | <b>0.63</b> | <b>0.55</b> | <b>7.5</b>        | <b>1.5</b> | <b>7.72</b>     | <b>2.9</b>        | <b>3.5</b>      | <b>3.7</b>  | <b>6.9</b>      |
| <b>MT2</b>   | <b>1</b>      | <b>1</b>    | <b>0.95</b> | <b>0.88</b> | <b>2.79</b>       | <b>5</b>   | <b>6</b>        | <b>1</b>          | <b>1.5</b>      | <b>11.7</b> | <b>10.3</b>     |
| <b>BCBL</b>  | <b>1</b>      | <b>0.83</b> | <b>1.07</b> | <b>0.98</b> | <b>0</b>          | <b>0</b>   | <b>0</b>        | <b>0.2</b>        | <b>0.2</b>      | <b>0.4</b>  | <b>0.3</b>      |
