# Supplementary material
Source: PubMed Central journal article supplement (PMC3331941)

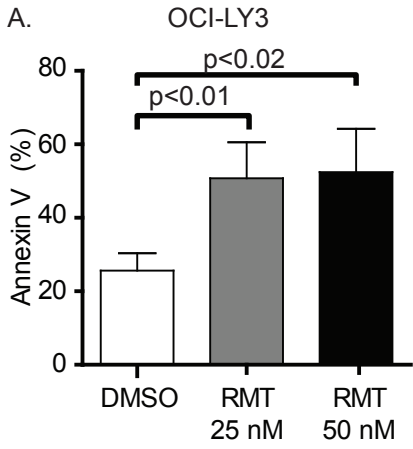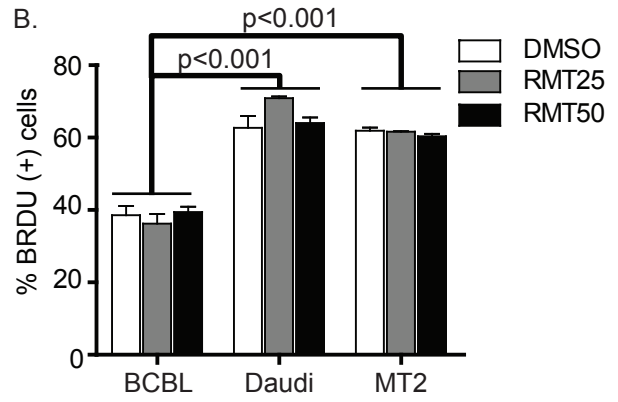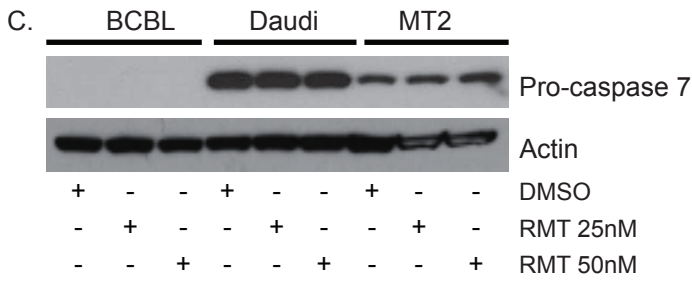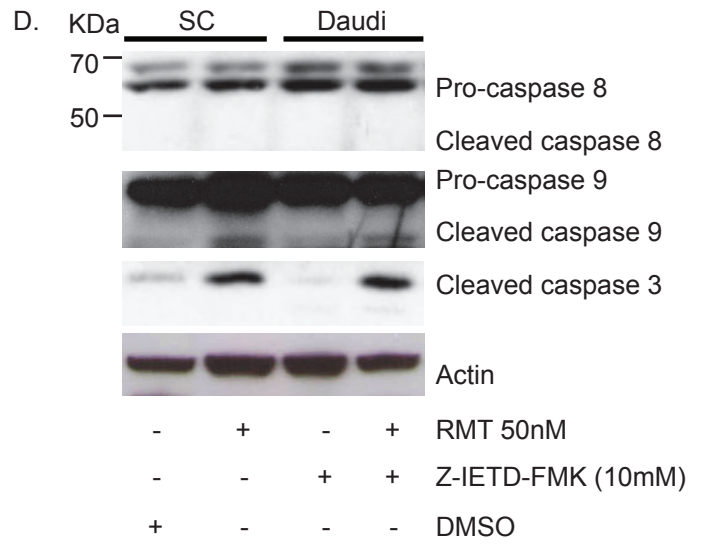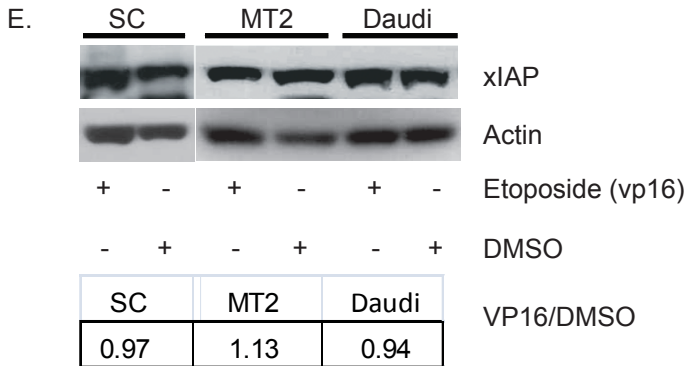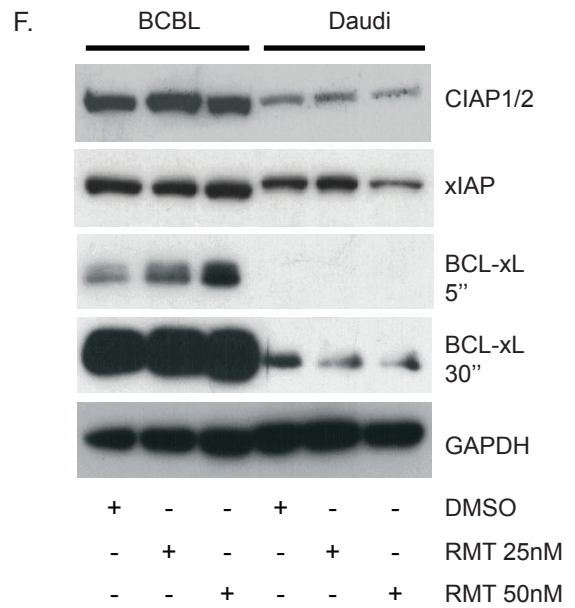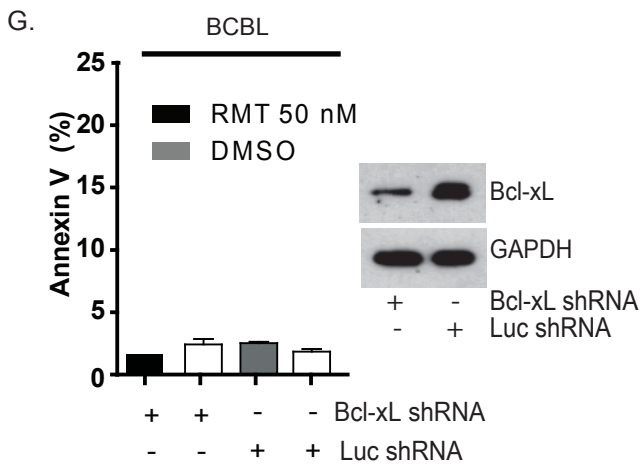

Supplement: NIHMS348687-supplement-03.pdf [file NIHMS348687-supplement-03.pdf]
